# Supplementary material for: Biological functions of casein kinase 1 isoforms and putative roles in tumorigenesis
Source: PubMed Central journal article supplement (PMC4201705; doi:10.1186/1476-4598-13-231), 2014-10-11

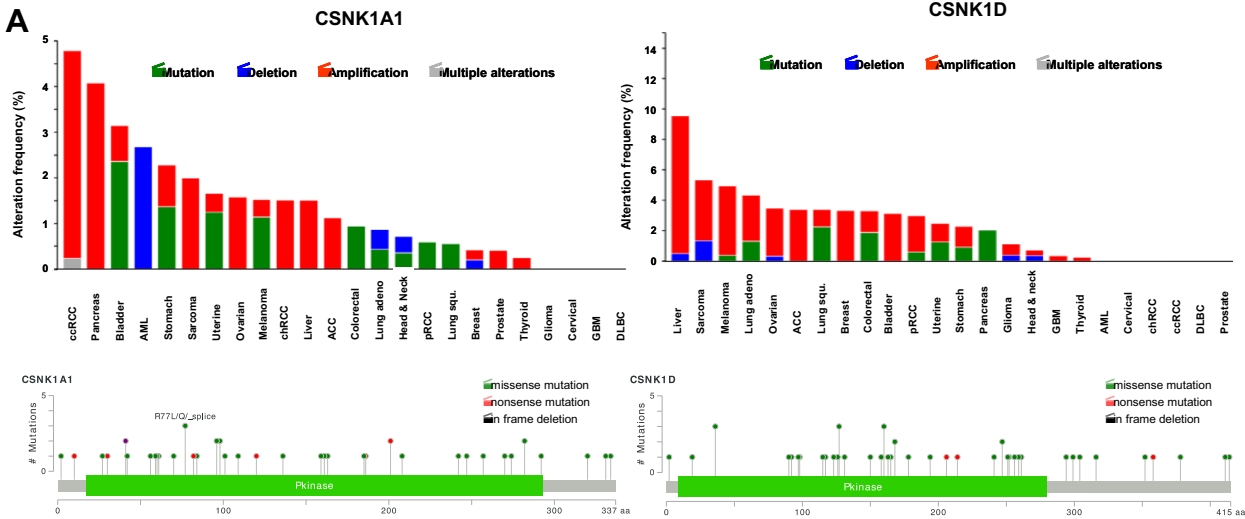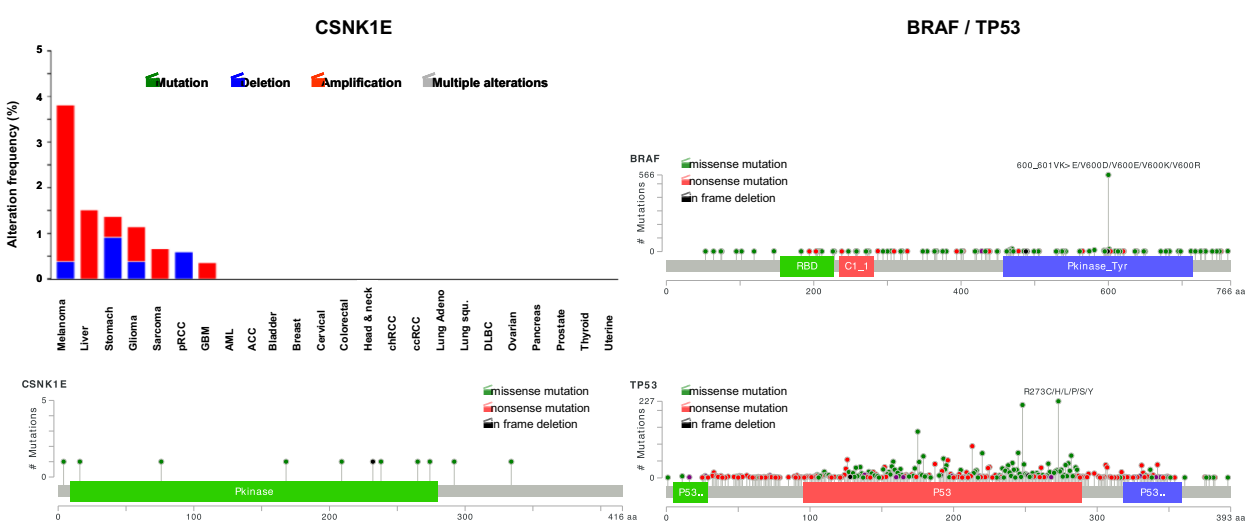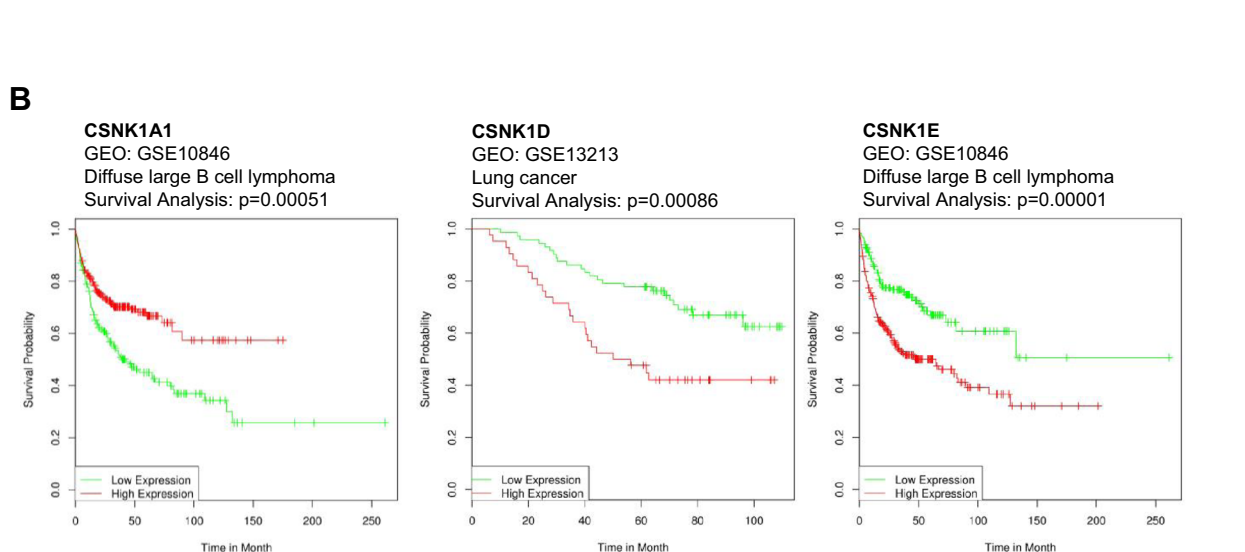

Supplement: 12943_2014_1434_MOESM3_ESM.pdf [file 12943_2014_1434_MOESM3_ESM.pdf]
