# Supplementary material for: Biological functions of casein kinase 1 isoforms and putative roles in tumorigenesis
Source: Mol Cancer. 2014 Oct 11;13:231. doi: 10.1186/1476-4598-13-231 (PMC4201705; doi:10.1186/1476-4598-13-231)
Supplement: Supplementary file 2 — Authors’ original file for figure 2 [file 12943_2014_1434_MOESM2_ESM.pdf]

breast    brain    colon    leukemia    melanoma    lung    ovarian    pr.    renal

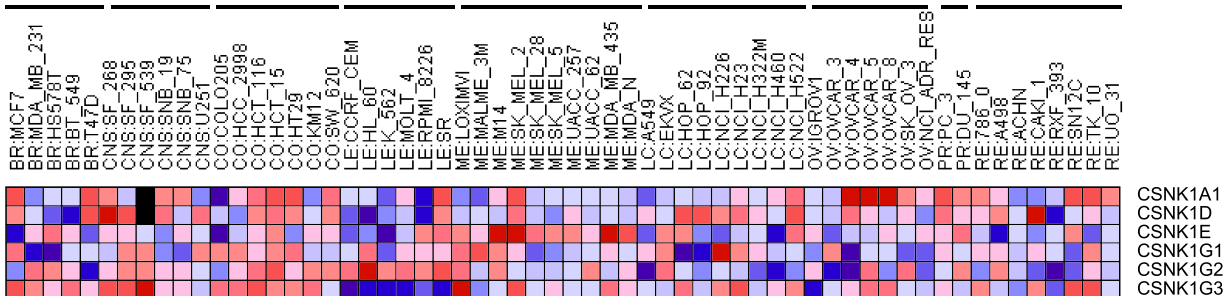

# B

breast    prostate    lung    colon    lymphoma    melanoma    bladder    uterus

follicular large B-cell

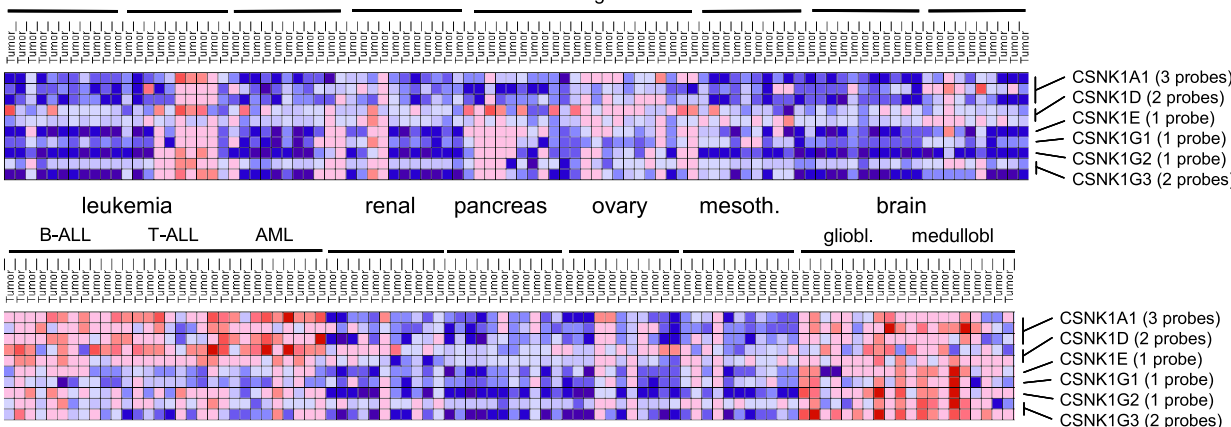

**Color scheme legend  
(expression)**
